# Supplementary material for: Evolution from a single relaxation process to two-step relaxation processes of Dy2 single-molecule magnets via the modulations of the terminal solvent ligands
Source: Royal Society of Chemistry journal article supplement (doi:10.1039/d0dt03093g), 2020-11-17
Supplement: d0dt03093g1.pdf [file d0dt03093g1.pdf]

## *Supporting Information*

### **Evolution from single relaxation process to two-step relaxation processes of Dy<sub>2</sub> single-molecule magnets via the modulations of the terminal solvent ligands**

**Dawei Li,<sup>a</sup> Man-Man Ding,<sup>b</sup> Yuan Huang,<sup>a</sup> David Felipe Tello Yepes,<sup>d</sup> Haiyan Li,<sup>a</sup> Yahong Li,<sup>\*a</sup> Yi-Quan Zhang,<sup>\*b</sup> and Jinlei Yao<sup>\*c</sup>**

*<sup>a</sup>College of Chemistry, Chemical Engineering and Materials Science, Soochow University, Suzhou 215123, P. R. China. E-mail: liyahong@suda.edu.cn*

*<sup>b</sup>Jiangsu Key Laboratory for NSLSCS, School of Physical Science and Technology, Nanjing Normal University, Nanjing 210023, P. R. China. E-mail: zhangyiquan@njnu.edu.cn*

*<sup>c</sup>Jiangsu Key Laboratory of Micro and Nano Heat Fluid Flow Technology and Energy Application, School of Physical Science and Technology, Suzhou University of Science and Technology, Suzhou 215009, P. R. China. E-mail: jlyao@usts.edu.cn*

*<sup>d</sup>College of Environmental Engineering, University of Waterloo, Waterloo N2L3G1, Canada*

## Supplementary Information Contents

|                                                                                                                                 |    |
|---------------------------------------------------------------------------------------------------------------------------------|----|
| 1. $^1\text{H}$ , $^{13}\text{C}$ NMR spectra of $\text{H}_2\text{L}$ .....                                                     | 3  |
| 2. PXRD patterns of <b>1-3</b> .....                                                                                            | 4  |
| 3. IR spectra of $\text{H}_2\text{L}$ and <b>1-3</b> .....                                                                      | 6  |
| 4. Crystal data and structure refinement detail for <b>1-3</b> .....                                                            | 7  |
| 5. Selected bond lengths and angles for <b>1-3</b> .....                                                                        | 8  |
| 6. SHAPE program details for <b>1-3</b> .....                                                                                   | 11 |
| 7. The TGA curves of complexes <b>1-3</b> .....                                                                                 | 12 |
| 8. Supramolecular framework of <b>1</b> , <b>2</b> and <b>3</b> generated by intermolecular hydrogen-bonding interactions ..... | 13 |
| 9. Hydrogen-bonding parameters ( $\text{\AA}$ , deg) of <b>1</b> , <b>2</b> and <b>3</b> .....                                  | 15 |
| 10. The $M$ vs $H$ plots for <b>1</b> (a), <b>2</b> (b) and <b>3</b> (c) at 2 k .....                                           | 16 |
| 11. Ac susceptibilities measurements for <b>3</b> at 2-35 K in 0 Oe, 500 Oe, 1000 Oe and 2000 Oe field.....                     | 17 |
| 12. $\ln \tau$ versus $T^{-1}$ plots for complexes <b>1-3</b> at high temperatures .....                                        | 18 |
| 13. Best fitted parameters for complexes <b>1-3</b> under 0 Oe dc field.....                                                    | 19 |
| 14. Examples of $\text{Dy}_2$ SMMs bearing $[\text{Dy}_2\text{O}_2]$ units.....                                                 | 21 |
| 15. Computational details .....                                                                                                 | 22 |

# 1. $^1\text{H}$ , $^{13}\text{C}$ NMR spectra of $\text{H}_2\text{L}$

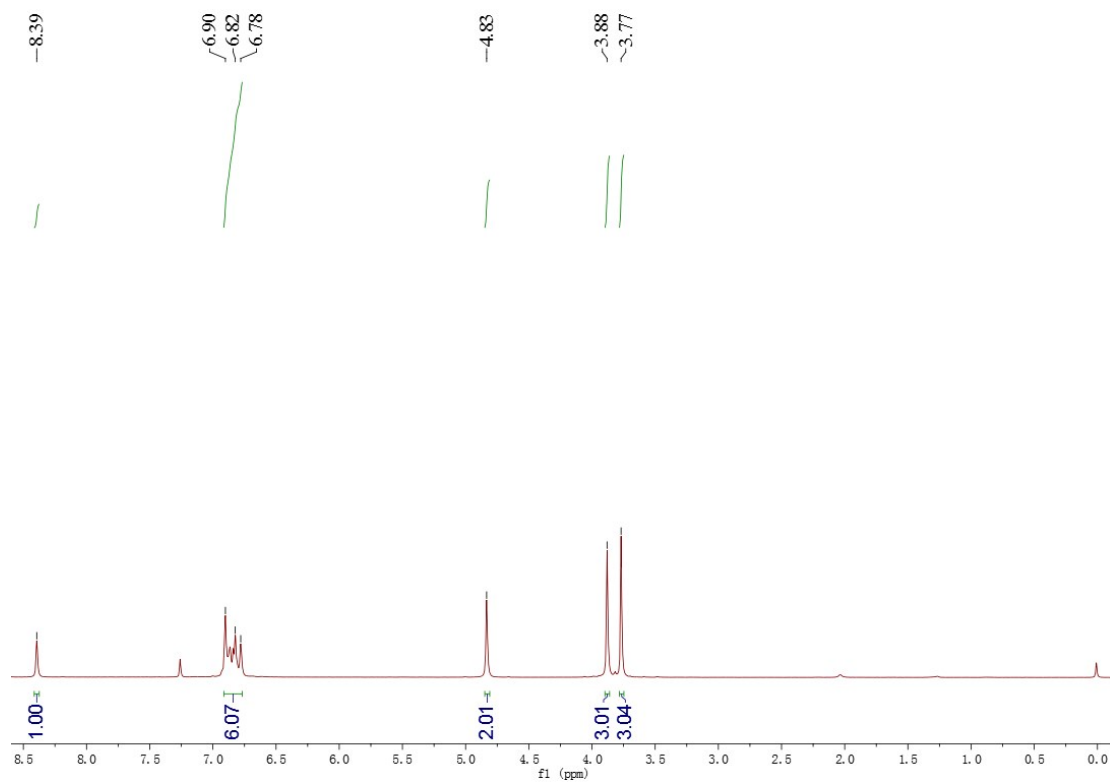

(a)

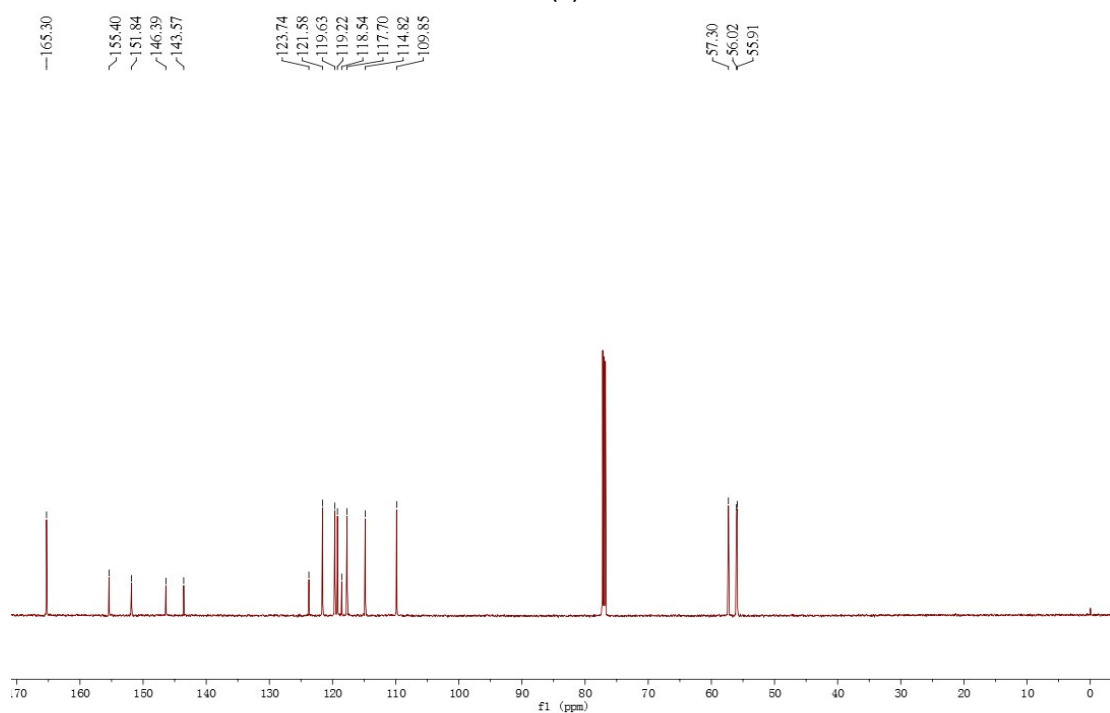

(b)

**Fig. S1.** The  $^1\text{H}$  NMR (a) and  $^{13}\text{C}$  NMR (b) spectra of  $\text{H}_2\text{L}$ .

## 2. PXRD patterns of 1-3

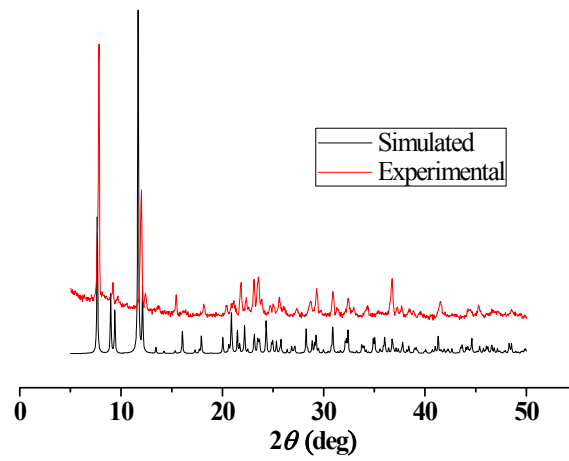

(a)

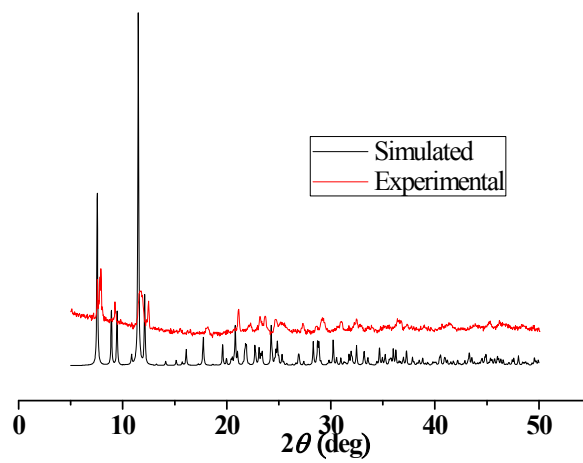

(b)

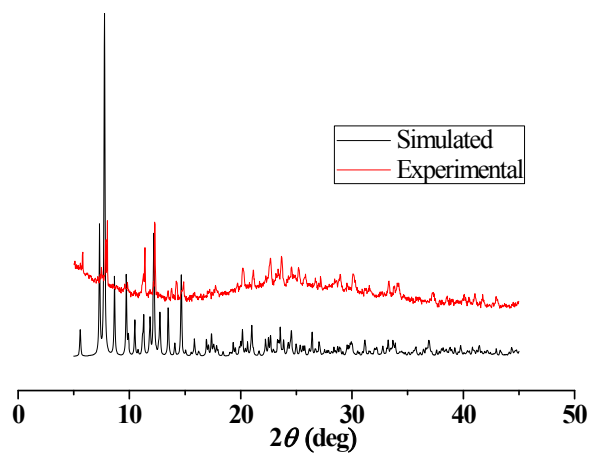

(c)

**Fig. S2.** PXRD patterns of **1** (a), **2** (b) and **3** (c).

### 3. IR spectra of H<sub>2</sub>L and 1-3

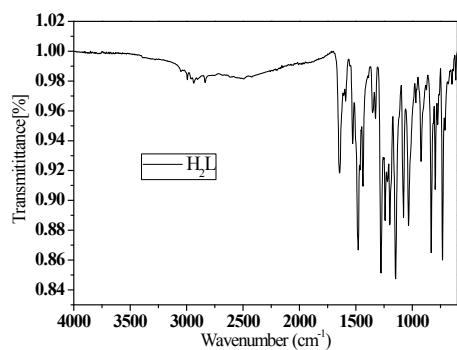

(a)

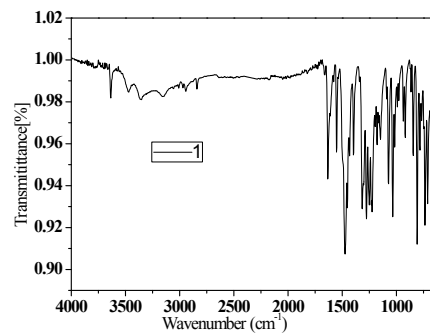

(b)

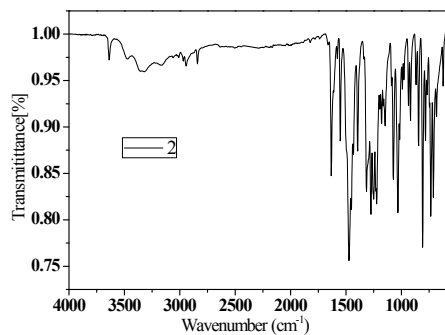

(c)

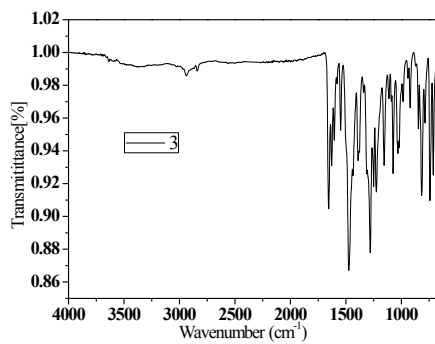

(d)

**Fig. S3.** FT-IR spectra of H<sub>2</sub>L, 1 (a), 2 (b) and 3 (c).

## 4. Crystal date and structure refinement detail for 1-3

**Table S1.** Crystal and structure refinement data for 1-3

|                                                     | <b>1</b>                                                          | <b>2</b>                                                          | <b>3</b>                                                          |
|-----------------------------------------------------|-------------------------------------------------------------------|-------------------------------------------------------------------|-------------------------------------------------------------------|
| Empirical formula                                   | C <sub>34</sub> H <sub>38</sub> Dy <sub>2</sub> N <sub>4</sub>    | C <sub>36</sub> H <sub>42</sub> Dy <sub>2</sub>                   | C <sub>39</sub> H <sub>47</sub> Dy <sub>2</sub>                   |
|                                                     | O <sub>16</sub>                                                   | N <sub>4</sub> O <sub>16</sub>                                    | N <sub>6</sub> O <sub>16.5</sub>                                  |
| Temperature/K                                       | 296.15                                                            | 296.15                                                            | 296.15                                                            |
| Formula weigh                                       | 1083.68                                                           | 1111.73                                                           | 1188.84                                                           |
| Crystal system                                      | orthorhombic                                                      | orthorhombic                                                      | monoclinic                                                        |
| Space group                                         | <i>Pbcn</i>                                                       | <i>Pbcn</i>                                                       | <i>P2<sub>1</sub>/c</i>                                           |
| <i>a</i> /Å                                         | 18.8341(9)                                                        | 18.6721(16)                                                       | 16.0720(14)                                                       |
| <i>b</i> /Å                                         | 8.8537(4)                                                         | 9.0807(8)                                                         | 16.4037(14)                                                       |
| <i>c</i> /Å                                         | 23.0950(12)                                                       | 23.3406(19)                                                       | 18.1256(16)                                                       |
| <i>α</i> /°                                         | 90                                                                | 90                                                                | 90                                                                |
| <i>β</i> /°                                         | 90                                                                | 90                                                                | 100.123(2)                                                        |
| <i>γ</i> /°                                         | 90                                                                | 90                                                                | 90                                                                |
| Volume/Å <sup>3</sup>                               | 3851.1(3)                                                         | 3957.5(6)                                                         | 4704.2(7)                                                         |
| <i>Z</i>                                            | 4                                                                 | 4                                                                 | 4                                                                 |
| $\rho_{\text{calc}}/\text{g cm}^{-3}$               | 1.869                                                             | 1.866                                                             | 1.646                                                             |
| $\mu/\text{mm}^{-1}$                                | 3.927                                                             | 3.824                                                             | 3.223                                                             |
| <i>F</i> (000)                                      | 2120.0                                                            | 2184.0                                                            | 2296.0                                                            |
| Crystal size/mm <sup>3</sup>                        | 0.2 × 0.08 × 0.06                                                 | 0.12 × 0.08 × 0.08                                                | 0.3 × 0.05 × 0.03                                                 |
| $\theta$ range/°                                    | 5.084 to 50                                                       | 4.988 to 55.252                                                   | 5.15 to 55.168                                                    |
| Index ranges                                        | -18 ≤ <i>h</i> ≤ 22<br>-8 ≤ <i>k</i> ≤ 10<br>-13 ≤ <i>l</i> ≤ 27  | -24 ≤ <i>h</i> ≤ 24<br>-11 ≤ <i>k</i> ≤ 7<br>-28 ≤ <i>l</i> ≤ 30  | -20 ≤ <i>h</i> ≤ 18<br>-20 ≤ <i>k</i> ≤ 18<br>-19 ≤ <i>l</i> ≤ 23 |
| Reflections collected                               | 10639                                                             | 13824                                                             | 28271                                                             |
| Independent reflections                             | 3397 [ <i>R</i> (int) = 0.0813]                                   | 4557 [ <i>R</i> (int) = 0.0466]                                   | 10601 [ <i>R</i> (int) = 0.0532]                                  |
| Data/restraints/parameter <i>s</i>                  | 3397/4/259                                                        | 4557/3/268                                                        | 10601/36/584                                                      |
| Goodness-of-fit on <i>F</i> <sup>2</sup>            | 1.010                                                             | 1.078                                                             | 1.058                                                             |
| Final <i>R</i> indexes [ <i>I</i> ≥ 2σ( <i>I</i> )] | <i>R</i> <sub>1</sub> = 0.0484<br><i>wR</i> <sub>2</sub> = 0.1000 | <i>R</i> <sub>1</sub> = 0.0445<br><i>wR</i> <sub>2</sub> = 0.1181 | <i>R</i> <sub>1</sub> = 0.0590<br><i>wR</i> <sub>2</sub> = 0.1515 |
| Final <i>R</i> indexes [all data]                   | <i>R</i> <sub>1</sub> = 0.0981<br><i>wR</i> <sub>2</sub> = 0.1106 | <i>R</i> <sub>1</sub> = 0.0701<br><i>wR</i> <sub>2</sub> = 0.1323 | <i>R</i> <sub>1</sub> = 0.1154<br><i>wR</i> <sub>2</sub> = 0.1848 |
| Largest diff. peak/hole/<br>eÅ <sup>-3</sup>        | 1.40/-0.78                                                        | 2.05/-1.40                                                        | 2.84/-1.37                                                        |

## 5. Selected bond lengths and angles for 1-3

**Table S2.** Selected bond lengths (Å) and angle (°) for complexes **1-3**

| <b>1</b>                             |            |                        |            |
|--------------------------------------|------------|------------------------|------------|
| Dy1-N1                               | 2.428(7)   | Dy1-O3 <sup>1</sup>    | 2.504(5)   |
| Dy1-O2                               | 2.309(6)   | Dy1-O1                 | 2.161(6)   |
| Dy1-O2 <sup>1</sup>                  | 2.347(5)   | Dy1-O5                 | 2.371(7)   |
| Dy1-O6                               | 2.422(7)   | O2-Dy1 <sup>1</sup>    | 2.347(5)   |
| Dy1-O7                               | 2.486(6)   | O3-Dy1 <sup>1</sup>    | 2.504(5)   |
| N1-Dy1-O7                            | 75.0(2)    | O6-Dy1-O7              | 52.3(2)    |
| N1-Dy1-O3 <sup>1</sup>               | 147.6(2)   | O6-Dy1-O3 <sup>1</sup> | 69.9(2)    |
| O2 <sup>1</sup> -Dy1-N1              | 134.1(2)   | O7-Dy1-O3 <sup>1</sup> | 120.5(2)   |
| O2-Dy1-N1                            | 78.1(2)    | O1-Dy1-N1              | 74.8(2)    |
| O2-Dy1-O2 <sup>1</sup>               | 67.3(2)    | O1-Dy1-O2 <sup>1</sup> | 143.23(19) |
| O2 <sup>1</sup> -Dy1-O6              | 90.0(2)    | O1-Dy1-O2              | 149.40(19) |
| O2-Dy1-O6                            | 99.0(2)    | O1-Dy1-O6              | 85.7(2)    |
| O2-Dy1-O7                            | 75.7(2)    | O1-Dy1-O7              | 83.9(2)    |
| O2 <sup>1</sup> -Dy1-O7              | 121.3(2)   | O1-Dy1-O3 <sup>1</sup> | 78.85(19)  |
| O2 <sup>1</sup> -Dy1-O3 <sup>1</sup> | 65.48(18)  | O1-Dy1-O5              | 86.2(2)    |
| O2-Dy1-O3 <sup>1</sup>               | 131.25(18) | O5-Dy1-N1              | 80.1(2)    |
| O2-Dy1-O5                            | 102.8(2)   | O5-Dy1-O6              | 149.5(2)   |
| O2 <sup>1</sup> -Dy1-O5              | 79.3(2)    | O5-Dy1-O7              | 154.9(2)   |
| O6-Dy1-N1                            | 125.5(2)   | O5-Dy1-O3 <sup>1</sup> | 79.8(2)    |
| Dy1-O2-Dy1 <sup>1</sup>              | 106.4(2)   |                        |            |

<sup>1</sup>-X,+Y,1/2-Z

| <b>2</b>                             |            |                                      |            |
|--------------------------------------|------------|--------------------------------------|------------|
| Dy1-O2                               | 2.329(4)   | Dy1-O5                               | 2.391(5)   |
| Dy1-O2 <sup>1</sup>                  | 2.312(5)   | Dy1-O6                               | 2.414(6)   |
| Dy1-O3                               | 2.510(5)   | O2-Dy1 <sup>1</sup>                  | 2.312(5)   |
| Dy1-O1 <sup>1</sup>                  | 2.159(5)   | O1-Dy1 <sup>1</sup>                  | 2.159(5)   |
| Dy1-O7                               | 2.462(5)   | N1-Dy1 <sup>1</sup>                  | 2.439(5)   |
| Dy1-N1 <sup>1</sup>                  | 2.440(5)   | O1 <sup>1</sup> -Dy1-O7              | 84.2(2)    |
| O2 <sup>1</sup> -Dy1-O2              | 67.08(18)  | O1 <sup>1</sup> -Dy1-N1 <sup>1</sup> | 75.66(18)  |
| O2 <sup>1</sup> -Dy1-O3              | 130.83(16) | O1 <sup>1</sup> -Dy1-O5              | 86.0(2)    |
| O2-Dy1-O3                            | 65.64(16)  | O1 <sup>1</sup> -Dy1-O6              | 86.7(2)    |
| O2-Dy1-O7                            | 122.18(18) | O7-Dy1-O3                            | 120.97(18) |
| O2 <sup>1</sup> -Dy1-O7              | 75.21(18)  | N1 <sup>1</sup> -Dy1-O3              | 148.84(18) |
| O2 <sup>1</sup> -Dy1-N1 <sup>1</sup> | 77.45(17)  | N1 <sup>1</sup> -Dy1-O7              | 74.04(19)  |
| O2-Dy1-N1 <sup>1</sup>               | 132.83(18) | O5-Dy1-O3                            | 79.82(19)  |
| O2-Dy1-O5                            | 78.28(17)  | O5-Dy1-O7                            | 154.52(18) |
| O2 <sup>1</sup> -Dy1-O5              | 103.18(19) | O5-Dy1-N1 <sup>1</sup>               | 80.76(19)  |



|                                      |            |                          |            |
|--------------------------------------|------------|--------------------------|------------|
| O2 <sup>1</sup> -Dy1-O6              | 97.4(2)    | O5-Dy1-O6                | 150.5(2)   |
| O2-Dy1-O6                            | 90.8(2)    | O6-Dy1-O3                | 70.76(19)  |
| O1 <sup>1</sup> -Dy1-O2              | 143.08(18) | O6-Dy1-O7                | 52.02(19)  |
| O1 <sup>1</sup> -Dy1-O2 <sup>1</sup> | 149.73(17) | O6-Dy1-N1 <sup>1</sup>   | 124.7(2)   |
| O1 <sup>1</sup> -Dy1-O3              | 78.88(17)  | Dy1 <sup>1</sup> -O2-Dy1 | 106.84(17) |

<sup>1</sup>1-X,+Y,1/2-Z

### 3

|              |            |              |            |
|--------------|------------|--------------|------------|
| Dy1A-Dy1     | 3.7987(5)  | Dy1-O2A      | 2.297(4)   |
| Dy1A-O2A     | 2.341(5)   | Dy1-O2       | 2.323(5)   |
| Dy1A-O2      | 2.354(4)   | Dy1-O1       | 2.182(5)   |
| Dy1A-O1A     | 2.167(5)   | Dy1-O5       | 2.285(6)   |
| Dy1A-O3      | 2.476(5)   | Dy1-O3A      | 2.473(6)   |
| Dy1A-O5A     | 2.313(6)   | Dy1-N1       | 2.480(6)   |
| Dy1A-O6A     | 2.444(6)   | Dy1-O7       | 2.427(6)   |
| Dy1A-N1A     | 2.472(6)   | Dy1-O6       | 2.460(7)   |
| Dy1A-O7A     | 2.488(6)   | Dy1-N3       | 2.869(10)  |
| Dy1A-N3A     | 2.871(8)   | O2A-Dy1-Dy1A | 35.39(11)  |
| O2A-Dy1A-Dy1 | 34.64(10)  | O2A-Dy1-O2   | 71.16(16)  |
| O2A-Dy1A-O2  | 69.88(15)  | O2A-Dy1-O3A  | 65.41(18)  |
| O2A-Dy1A-O3  | 124.58(16) | O2A-Dy1-N1   | 146.47(19) |
| O2A-Dy1A-O6A | 79.8(2)    | O2A-Dy1-O7   | 89.33(19)  |
| O2A-Dy1A-N1A | 78.52(18)  | O2A-Dy1-O6   | 75.4(2)    |
| O2A-Dy1A-O7A | 122.6(2)   | O2A-Dy1-N3   | 81.0(2)    |
| O2A-Dy1A-N3A | 101.3(3)   | O2-Dy1-Dy1A  | 35.96(11)  |
| O2-Dy1A-Dy1  | 35.43(12)  | O2-Dy1-O3A   | 125.15(19) |
| O2-Dy1A-O3   | 65.28(16)  | O2-Dy1-N1    | 76.95(18)  |
| O2-Dy1A-O6A  | 85.49(19)  | O2-Dy1-O7    | 81.9(2)    |
| O2-Dy1A-N1A  | 145.64(19) | O2-Dy1-O6    | 123.4(3)   |
| O2-Dy1A-O7A  | 77.0(2)    | O2-Dy1-N3    | 102.3(3)   |
| O2-Dy1A-N3A  | 79.5(2)    | O1-Dy1-Dy1A  | 171.04(17) |
| O1A-Dy1A-Dy1 | 169.36(16) | O1-Dy1-O2A   | 139.47(19) |
| O1A-Dy1A-O2A | 149.08(18) | O1-Dy1-O2    | 148.84(19) |
| O1A-Dy1A-O2  | 139.82(18) | O1-Dy1-O5    | 84.9(2)    |
| O1A-Dy1A-O3  | 77.21(18)  | O1-Dy1-O3A   | 77.9(2)    |
| O1A-Dy1A-O5A | 85.0(2)    | O1-Dy1-N1    | 73.6(2)    |
| O1A-Dy1A-O6A | 106.3(2)   | O1-Dy1-O7    | 100.5(2)   |
| O1A-Dy1A-N1A | 73.9(2)    | O1-Dy1-O6    | 79.5(3)    |
| O1A-Dy1A-O7A | 81.0(2)    | O1-Dy1-N3    | 90.9(3)    |
| O1A-Dy1A-N3A | 94.5(3)    | O5-Dy1-Dy1A  | 89.54(16)  |
| O3-Dy1A-Dy1  | 94.18(11)  | O5-Dy1-O2A   | 101.74(19) |
| O3-Dy1A-O7A  | 76.7(2)    | O5-Dy1-O2    | 81.8(2)    |
| O3-Dy1A-N3A  | 100.9(2)   | O5-Dy1-O3A   | 76.1(2)    |

|              |            |              |            |
|--------------|------------|--------------|------------|
| O5A-Dy1A-Dy1 | 87.24(15)  | O5-Dy1-N1    | 83.4(2)    |
| O5A-Dy1A-O2A | 79.26(19)  | O5-Dy1-O7    | 156.1(2)   |
| O5A-Dy1A-O2  | 100.7(2)   | O5-Dy1-O6    | 150.1(3)   |
| O5A-Dy1A-O3  | 78.8(2)    | O5-Dy1-N3    | 175.7(3)   |
| O5A-Dy1A-O6A | 154.5(2)   | O3A-Dy1-Dy1A | 93.92(14)  |
| O5A-Dy1A-N1A | 86.0(2)    | O3A-Dy1-N1   | 146.2(2)   |
| O5A-Dy1A-O7A | 153.8(2)   | O3A-Dy1-N3   | 102.3(3)   |
| O5A-Dy1A-N3A | 179.4(3)   | N1-Dy1-Dy1A  | 112.73(14) |
| O6A-Dy1A-Dy1 | 83.74(18)  | N1-Dy1-N3    | 96.2(3)    |
| O6A-Dy1A-O3  | 125.5(2)   | O7-Dy1-Dy1A  | 87.45(16)  |
| O6A-Dy1A-N1A | 75.8(2)    | O7-Dy1-O3A   | 127.7(2)   |
| O6A-Dy1A-O7A | 51.6(2)    | O7-Dy1-N1    | 76.0(2)    |
| O6A-Dy1A-N3A | 25.9(3)    | O7-Dy1-O6    | 53.2(3)    |
| N1A-Dy1A-Dy1 | 112.75(15) | O7-Dy1-N3    | 25.9(3)    |
| N1A-Dy1A-O3  | 148.36(18) | O6-Dy1-Dy1A  | 102.3(2)   |
| N1A-Dy1A-O7A | 110.8(2)   | O6-Dy1-O3A   | 75.7(3)    |
| N1A-Dy1A-N3A | 94.1(2)    | O6-Dy1-N1    | 115.8(2)   |
| O7A-Dy1A-Dy1 | 103.34(16) | O6-Dy1-N3    | 27.3(3)    |
| O7A-Dy1A-N3A | 25.7(2)    | N3-Dy1-Dy1A  | 94.5(2)    |
| N3A-Dy1A-Dy1 | 93.24(19)  | Dy1-O2A-Dy1A | 109.97(17) |
| Dy1-O2-Dy1A  | 108.62(18) |              |            |

---

## 6. SHAPE program details for 1-3

**Table S3.** Agreement factor between the coordination polyhedron of the Dy<sup>III</sup> ions in **1-3** and the various ideal polyhedral calculated by the SHAPE program.

| Agreement factor for Dy <sup>III</sup> ion in complexes | <i>TDD-8</i> ( $D_{2d}$ ) | <i>SAPR-8</i> ( $D_{4d}$ ) | <i>JSD-8</i> ( $D_{2d}$ ) |
|---------------------------------------------------------|---------------------------|----------------------------|---------------------------|
| Dy <sup>III</sup> in <b>1</b>                           | <b>2.590</b>              | 4.653                      | 3.833                     |
|                                                         | <b>2.590</b>              | 4.653                      | 3.833                     |
| Dy <sup>III</sup> in <b>2</b>                           | <b>2.657</b>              | 4.470                      | 3.906                     |
|                                                         | <b>2.657</b>              | 4.470                      | 3.906                     |
| Dy <sup>III</sup> in <b>3</b>                           | <b>1.743</b>              | 2.203                      | 3.540                     |
|                                                         | 2.304                     | <b>2.146</b>               | 4.331                     |

*TDD-8*( $D_{2d}$ ) = Triangular dodecahedron

*SAPR-8*( $D_{4d}$ ) = Square antiprism

*JSD-8*( $D_{2d}$ ) = Snub diphenooid J84

## 7. The TGA curves of complexes 1-3

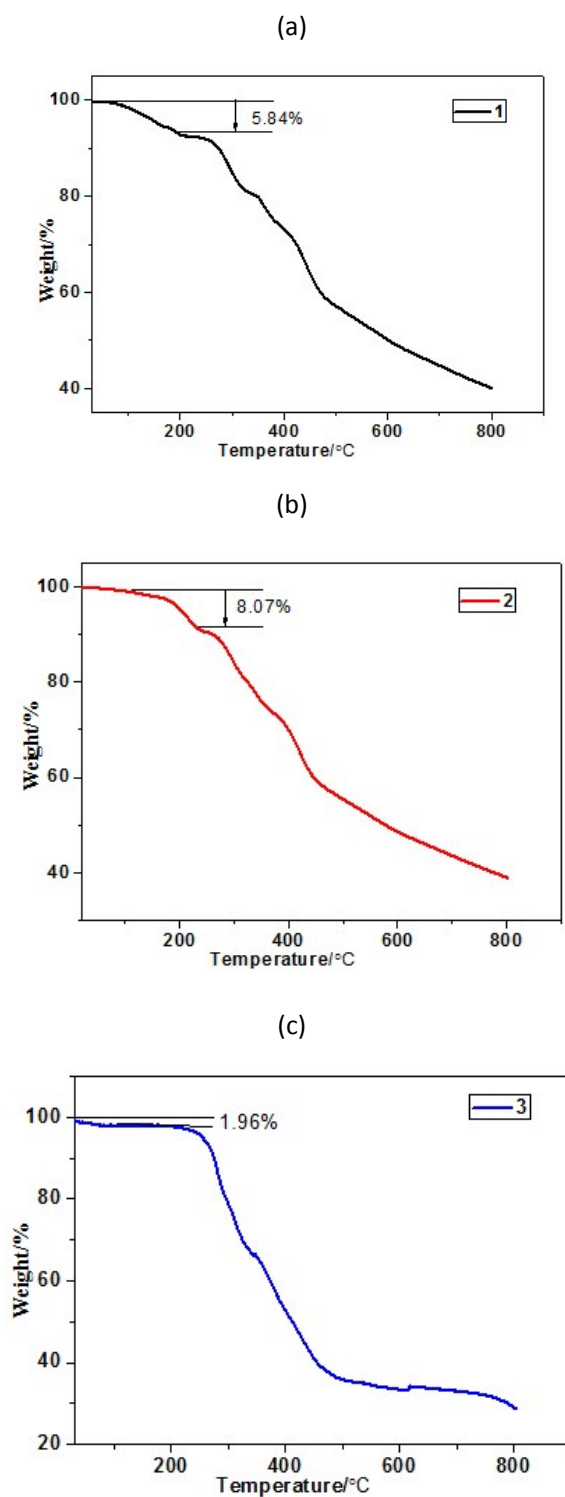

**Fig. S4.** The TGA curves of complexes **1** (a), **2** (b) and **3** (c).

## 8. Supramolecular framework of 1, 2 and 3 generated by intermolecular hydrogen-bonding interactions

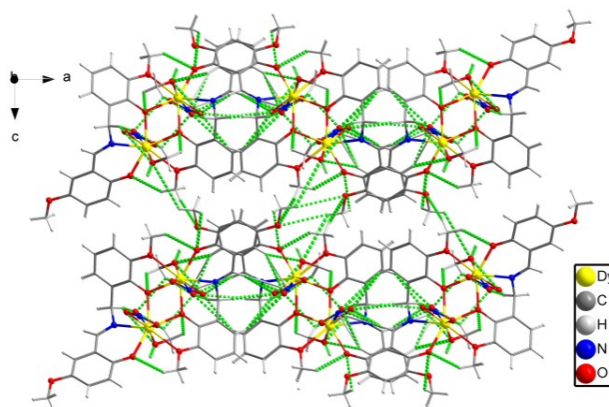

**Fig. S5.** 3D supramolecular framework of **1** generated by intermolecular hydrogen-bonding interactions.

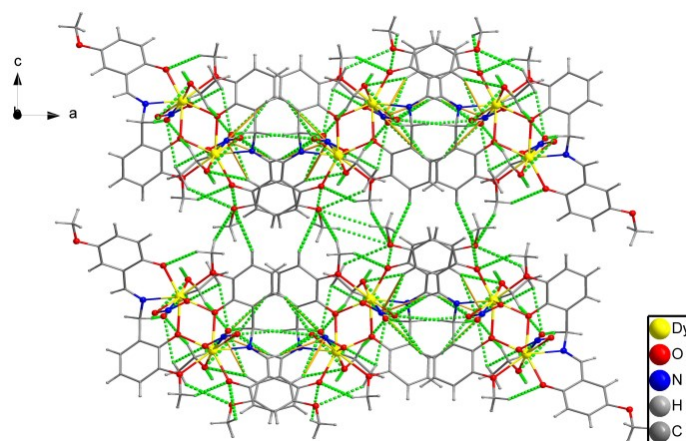

**Fig. S6.** 3D supramolecular framework of **2** generated by intermolecular hydrogen-bonding interactions.

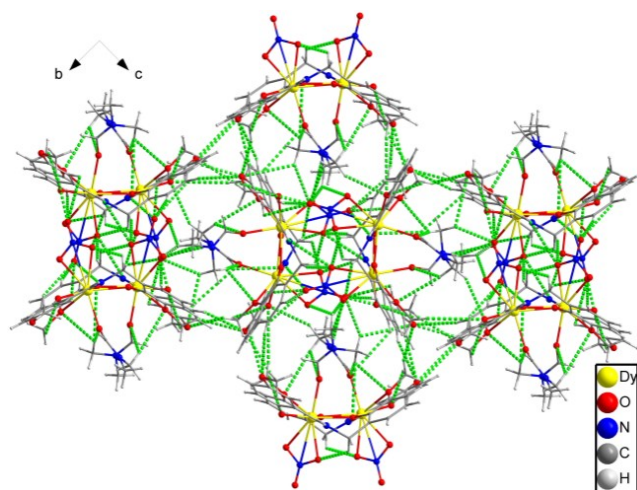

**Fig. S7.** 3D supramolecular framework of **3** generated by intermolecular hydrogen-bonding interactions.

## 9. Hydrogen-bonding parameters (Å, deg) of 1, 2 and 3

**Table S4.** Hydrogen-bonding parameters (Å, deg) of **1**.

| D-H...A       | <i>d</i> (D-H) | <i>d</i> (H...A) | D...A | ∠D-H...A |
|---------------|----------------|------------------|-------|----------|
| C8-H8A...O8   | 0.970          | 2.544            | 3.439 | 153.56   |
| C1-H1A...O1   | 0.960          | 2.468            | 3.118 | 124.89   |
| O5-H5A...O4   | 0.853          | 1.948            | 2.769 | 161.28   |
| C17-H17B...O6 | 0.960          | 2.645            | 3.398 | 135.69   |
| C17-H17B...O8 | 0.960          | 2.320            | 3.221 | 156.14   |

**Table S5.** Hydrogen-bonding parameters (Å, deg) of **2**.

| D-H...A       | <i>d</i> (D-H) | <i>d</i> (H...A) | D...A | ∠D-H...A |
|---------------|----------------|------------------|-------|----------|
| O5-H5...O4    | 0.857          | 1.977            | 2.825 | 170.41   |
| C1-H1A...O1   | 0.960          | 2.547            | 3.123 | 118.66   |
| C17-H17A...O8 | 0.970          | 2.307            | 3.233 | 159.49   |
| C17-H17B...O2 | 0.970          | 2.660            | 3.271 | 121.31   |

**Table S6.** Hydrogen-bonding parameters (Å, deg) of **3**.

| D-H...A        | <i>d</i> (D-H) | <i>d</i> (H...A) | D...A | ∠D-H...A |
|----------------|----------------|------------------|-------|----------|
| C9-H9A...O7    | 0.970          | 2.510            | 2.510 | 125.68   |
| C9A-H9AA...O6A | 0.970          | 2.524            | 2.524 | 125.33   |
| C32-H32C...O1A | 0.960          | 2.549            | 2.549 | 114.97   |
| C6A-H6A...O8   | 0.930          | 2.586            | 2.586 | 129.44   |
| C3AA-H3AC...O1 | 0.960          | 2.597            | 2.597 | 114.15   |
| C17-H17A...O8A | 0.960          | 2.657            | 2.657 | 142.78   |
| C18-H18C...O8A | 0.960          | 2.511            | 2.511 | 145.82   |

## 10. The $M$ vs $H$ plots for 1 (a), 2 (b) and 3 (c) at 2 k

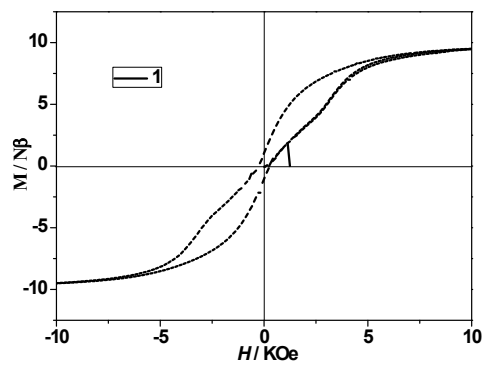

(a)

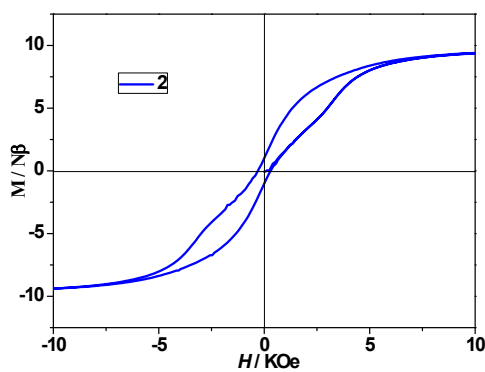

(b)

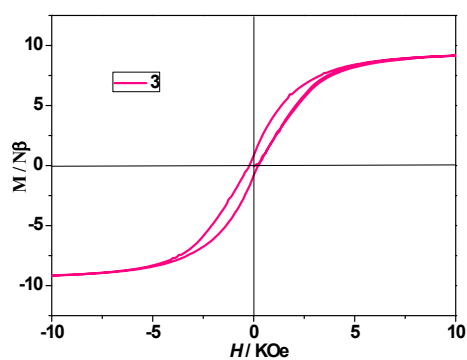

(c)

**Fig. S8.** Plots of magnetizations ( $M$ ) vs dc field ( $H$ ) for 1 (a), 2 (b) and 3 (c) at 2 K.



## 11. Ac susceptibilities measurements for **3** at 2-35 K in 0 Oe, 500 Oe, 1000 Oe and 2000 Oe field

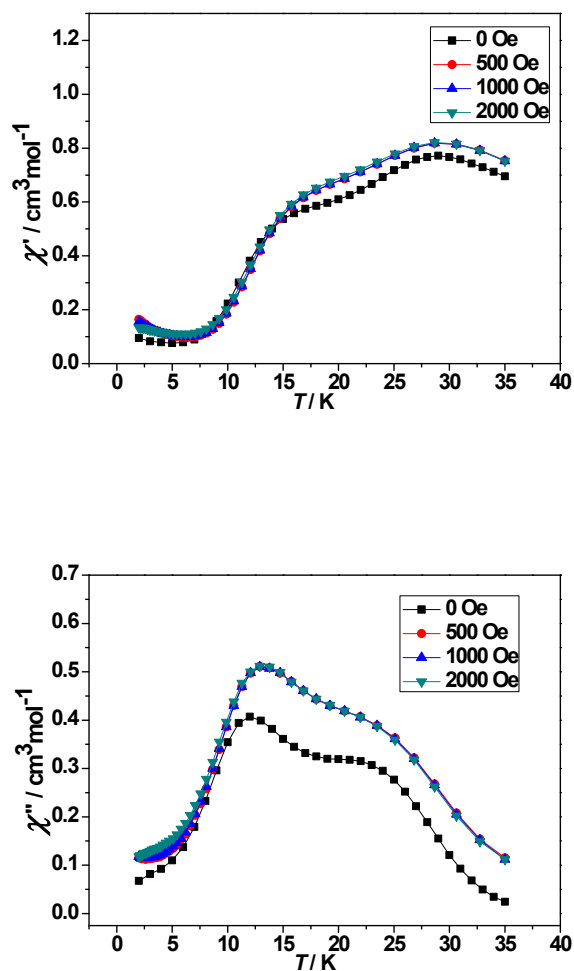

**Fig. S9.** Temperature dependence of the in-phase ( $\chi'$ ) and out-of-phase ( $\chi''$ ) ac susceptibility of **3** under 0 Oe, 500 Oe, 1000 Oe and 2000 Oe field in the frequency 1000 Hz at 2–35 K .

## 12. $\ln \tau$ versus $T^{-1}$ plots for complexes 1-3 at high temperatures

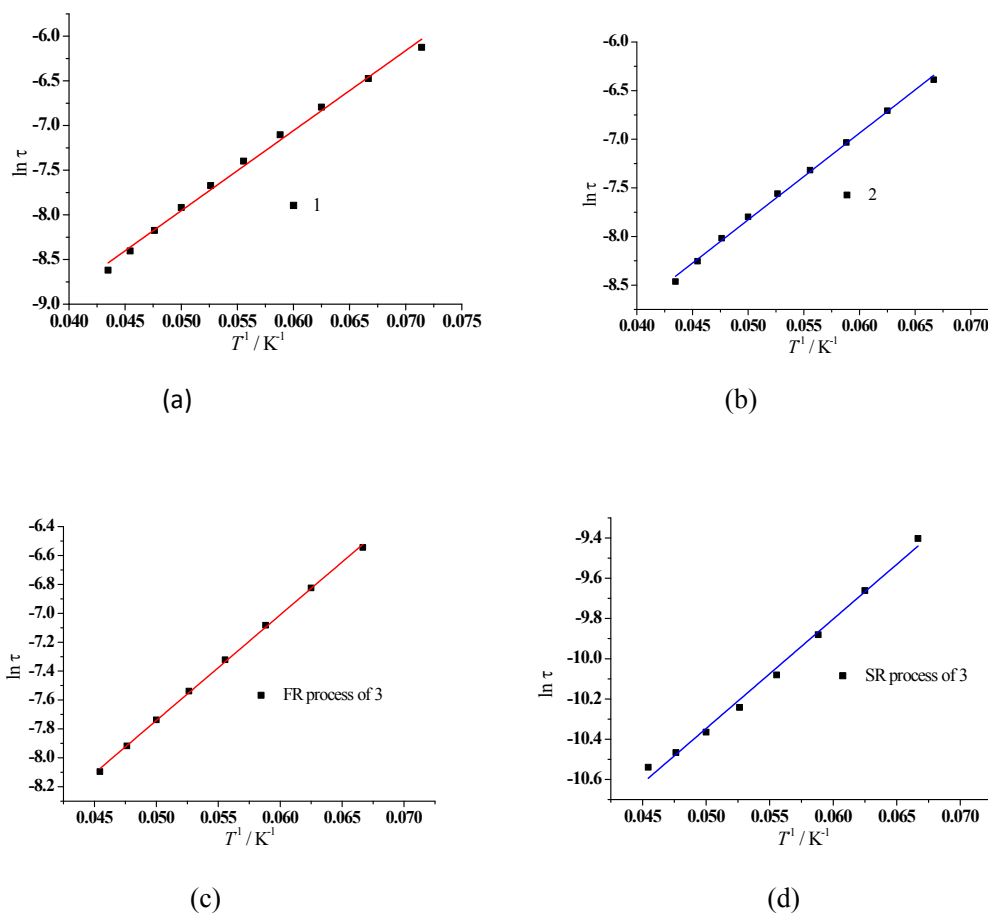

**Fig. S10.**  $\ln \tau$  versus  $T^{-1}$  plots for **1** (a), **2** (b) and **3** (c and d) at the high temperatures; the solid lines represent the least-squares fits of the experimental data to the Arrhenius law.

### 13. Best fitted parameters for complexes 1-3 under 0 Oe dc field

**Table S7.** Parameters from the fitting of the Cole-Cole plots of **1** according to the generalized Debye model.

| Temperature / K | $\chi_s / \text{cm}^3 \text{mol}^{-1}$ | $\chi_r / \text{cm}^3 \text{mol}^{-1}$ | $\tau / \text{s}$ | $\alpha$ | $R$      |
|-----------------|----------------------------------------|----------------------------------------|-------------------|----------|----------|
| 12              | 5.11E-08                               | 2.74E+00                               | 5.20E-03          | 5.16E-02 | 1.06E-01 |
| 13              | 9.19E-08                               | 2.45E+00                               | 3.34E-03          | 4.51E-02 | 1.49E-01 |
| 14              | 1.21E-07                               | 2.23E+00                               | 2.19E-03          | 3.24E-02 | 3.71E-02 |
| 15              | 2.78E-07                               | 2.08E+00                               | 1.54E-03          | 3.41E-02 | 5.64E-02 |
| 16              | 3.25E-07                               | 1.94E+00                               | 1.12E-03          | 4.00E-02 | 1.36E-01 |
| 17              | 5.83E-07                               | 1.81E+00                               | 8.22E-04          | 3.91E-02 | 1.08E-01 |
| 18              | 1.53E-06                               | 1.69E+00                               | 6.12E-04          | 2.90E-02 | 1.72E-01 |
| 19              | 1.96E-06                               | 1.59E+00                               | 4.66E-04          | 2.60E-02 | 7.89E-02 |
| 20              | 2.55E-06                               | 1.52E+00                               | 3.64E-04          | 3.43E-02 | 1.86E-01 |
| 21              | 4.55E-07                               | 1.42E+00                               | 2.82E-04          | 1.49E-02 | 8.38E-02 |
| 22              | 6.50E-07                               | 1.35E+00                               | 2.24E-04          | 1.52E-02 | 1.15E-01 |
| 23              | 1.90E-07                               | 1.32E+00                               | 1.81E-04          | 3.33E-02 | 2.06E-01 |

**Table S8.** Parameters from the fitting of the Cole-Cole plots of **2** according to the generalized Debye model.

| Temperature / K | $\chi_s / \text{cm}^3 \text{mol}^{-1}$ | $\chi_r / \text{cm}^3 \text{mol}^{-1}$ | $\tau / \text{s}$ | $\alpha$ | $R$      |
|-----------------|----------------------------------------|----------------------------------------|-------------------|----------|----------|
| 12              | 1.01E-16                               | 3.04E+00                               | 5.54E-03          | 9.96E-02 | 9.85E-02 |
| 13              | 2.44E-16                               | 2.82E+00                               | 3.78E-03          | 1.12E-01 | 9.22E-02 |
| 14              | 3.92E-16                               | 2.54E+00                               | 2.48E-03          | 1.04E-01 | 8.18E-02 |
| 15              | 6.20E-16                               | 2.30E+00                               | 1.68E-03          | 8.74E-02 | 1.03E-01 |
| 16              | 6.30E-16                               | 2.15E+00                               | 1.22E-03          | 8.57E-02 | 7.10E-02 |
| 17              | 1.01E-15                               | 1.97E+00                               | 8.82E-04          | 7.04E-02 | 1.94E-01 |
| 18              | 1.44E-15                               | 1.84E+00                               | 6.64E-04          | 6.21E-02 | 1.75E-01 |
| 19              | 2.36E-15                               | 1.76E+00                               | 5.21E-04          | 7.17E-02 | 1.05E-01 |
| 20              | 3.87E-15                               | 1.67E+00                               | 4.11E-04          | 7.13E-02 | 6.33E-02 |
| 21              | 6.54E-15                               | 1.60E+00                               | 3.30E-04          | 7.45E-02 | 1.06E-01 |
| 22              | 1.10E-14                               | 1.50E+00                               | 2.60E-04          | 5.13E-02 | 5.59E-02 |
| 23              | 1.50E-14                               | 1.42E+00                               | 2.11E-04          | 4.28E-02 | 5.71E-02 |

**Table S9.** Parameters from the fitting of the Cole-Cole plots of **3** according to the generalized Debye model.

| 8  | $\chi_{s,tot}/\text{cm}^3$<br>$\text{mol}^{-1}$ | $\Delta\chi_1/\text{cm}^3$<br>$\text{mol}^{-1}$ | $\tau_1 / \text{s}$ | $\alpha_1$ | $\Delta\chi_2/$<br>$\text{cm}^3\text{mol}^{-1}$ | $\tau_2 / \text{s}$ | $\alpha_2$ | R       |
|----|-------------------------------------------------|-------------------------------------------------|---------------------|------------|-------------------------------------------------|---------------------|------------|---------|
| 9  | 1.16E-12                                        | 2.12974                                         | 0.01961             | 0.10728    | 1.36582                                         | 0.00104             | 0.17028    | 0.00475 |
| 10 | 1.20E-17                                        | 2.90727                                         | 0.01395             | 0.31370    | 0.73096                                         | 0.00047             | 0.04929    | 0.00341 |
| 11 | 4.79E-31                                        | 1.95212                                         | 0.00783             | 0.16634    | 0.93041                                         | 0.00035             | 0.10261    | 0.00132 |
| 12 | 7.40E-31                                        | 1.61065                                         | 0.00524             | 0.11920    | 0.93098                                         | 0.00025             | 0.12176    | 0.00105 |
| 13 | 5.42E-31                                        | 1.40288                                         | 0.00365             | 0.09594    | 0.89366                                         | 0.00019             | 0.12995    | 0.00092 |
| 14 | 9.34E-31                                        | 1.24500                                         | 0.00263             | 0.08133    | 0.85366                                         | 0.00014             | 0.13975    | 0.00114 |
| 15 | 2.02E-30                                        | 1.13094                                         | 0.00191             | 0.07415    | 0.80308                                         | 0.00011             | 0.14444    | 0.00147 |
| 16 | 1.09E-30                                        | 1.02361                                         | 0.00144             | 0.06543    | 0.76906                                         | 0.00008             | 0.15200    | 0.00119 |
| 17 | 2.63E-30                                        | 0.95131                                         | 0.00109             | 0.06184    | 0.71909                                         | 0.00006             | 0.14157    | 0.00109 |
| 18 | 4.85E-30                                        | 0.88157                                         | 0.00084             | 0.05563    | 0.68096                                         | 0.00005             | 0.13004    | 0.00094 |
| 19 | 1.15E-29                                        | 0.82565                                         | 0.00066             | 0.05064    | 0.64348                                         | 0.00004             | 0.10724    | 0.00083 |
| 20 | 1.70E-29                                        | 0.76538                                         | 0.00053             | 0.04372    | 0.62142                                         | 0.00004             | 0.09809    | 0.00069 |
| 21 | 2.54E-29                                        | 0.70928                                         | 0.00044             | 0.03646    | 0.60384                                         | 0.00003             | 0.07767    | 0.00056 |
| 22 | 4.13E-29                                        | 0.64467                                         | 0.00036             | 0.02722    | 0.60236                                         | 0.00003             | 0.08662    | 0.00049 |

## 14. Examples of Dy<sub>2</sub> SMMs bearing [Dy<sub>2</sub>O<sub>2</sub>] units

**Table S10.** Examples of seven/eight-coordinated Dy<sub>2</sub> SMMs bearing [Dy<sub>2</sub>O<sub>2</sub>] units

| Complex                                                                                                                                 | Solvent ligand   | Donors                                           | Dy···Dy distance/Å     | Dy-O-Dy Angle/°                         | Magnetic behavior | Energy barrier | τ <sub>0</sub> (s)                                 |
|-----------------------------------------------------------------------------------------------------------------------------------------|------------------|--------------------------------------------------|------------------------|-----------------------------------------|-------------------|----------------|----------------------------------------------------|
| [Dy <sub>2</sub> (L <sup>1</sup> ) <sub>2</sub> (DBM) <sub>2</sub> (DMF) <sub>2</sub> ] <sup>[S1a]</sup>                                | DMF              | NO <sub>7</sub>                                  | 3.7900(3)              | 106.87(9)                               | F                 | 63             | 2.8 × 10 <sup>-11</sup>                            |
| [Dy <sub>2</sub> (L <sup>1</sup> ) <sub>2</sub> (DBM) <sub>2</sub> (DMA) <sub>2</sub> ]·2DMA·2CH <sub>3</sub> CN <sup>[S1a]</sup>       | DMA              | NO <sub>7</sub>                                  | 3.7549(4)              | 105.52(12)                              | AF                | /              | /                                                  |
| [Dy <sub>2</sub> (L <sup>2</sup> ) <sub>2</sub> (DBM) <sub>2</sub> (DMA) <sub>2</sub> ]·2DMA <sup>[S1b]</sup>                           | DMA              | NO <sub>7</sub>                                  | 3.7198(6)              | 105.3(2)                                | F                 | 77             | 2.74 × 10 <sup>-8</sup>                            |
| [Dy <sub>2</sub> (L <sup>2</sup> ) <sub>2</sub> (DBM) <sub>2</sub> (DMF) <sub>2</sub> ] <sup>[S1b]</sup>                                | DMF              | NO <sub>7</sub>                                  | 3.7270(19)             | 106.5(2)                                | F                 | 24             | 1.36 × 10 <sup>-6</sup>                            |
| [Dy <sub>2</sub> (hmi) <sub>2</sub> (NO <sub>3</sub> ) <sub>2</sub> (MeOH) <sub>2</sub> ] <sup>[S1c]</sup>                              | MeOH             | NO <sub>7</sub>                                  | 3.750                  | 106.41                                  | F                 | 56             | 3 × 10 <sup>-7</sup>                               |
| [Dy <sub>2</sub> (L <sup>3</sup> ) <sub>2</sub> (EtOH) <sub>2</sub> (NO <sub>3</sub> ) <sub>2</sub> ]·0.5py <sup>[S1d]</sup>            | EtOH             | NO <sub>7</sub>                                  | 3.8024(11)             | 109.5(2)                                | F                 | 66.7           | 2.21 × 10 <sup>-6</sup>                            |
| [Dy <sub>2</sub> (L <sup>4</sup> ) <sub>2</sub> (DBM) <sub>2</sub> (DMA) <sub>2</sub> ] <sup>[S1e]</sup>                                | DMA              | NO <sub>7</sub>                                  |                        | 106.16(10)                              | AF                | 124            | 2.52 × 10 <sup>-9</sup>                            |
| [Dy <sub>2</sub> (L <sup>4</sup> ) <sub>2</sub> (DBM) <sub>2</sub> (DMF) <sub>2</sub> ] <sup>[S1e]</sup>                                | DMF              | NO <sub>7</sub>                                  |                        | 106.55(14)                              | AF                | 91             | 9.63 × 10 <sup>-9</sup>                            |
| [Dy <sub>2</sub> L <sup>5</sup> (NO <sub>3</sub> ) <sub>2</sub> (MeOH) <sub>2</sub> ] <sup>[S1f]</sup>                                  | MeOH             | NO <sub>7</sub>                                  | 3.787(5)               | 109.32(12)                              | F                 | 198.8          | 2.66 × 10 <sup>-7</sup>                            |
| [Dy <sub>2</sub> L <sup>5</sup> (NO <sub>3</sub> ) <sub>2</sub> (EtOH) <sub>2</sub> ] <sup>[S1f]</sup>                                  | EtOH             | NO <sub>7</sub>                                  | 3.774(1)               | 108.84(9)                               | F                 | 131.3          | 2.16 × 10 <sup>-6</sup>                            |
| [(μ- <i>mbpymNO</i> ){( <i>tmh</i> ) <sub>3</sub> Dy <sub>2</sub> }] <sup>[S1g]</sup>                                                   | /                | NO <sub>7</sub><br>N <sub>2</sub> O <sub>6</sub> | 7.099                  | /                                       | AF                | 54.7<br>47.8   | 1.7 × 10 <sup>-6</sup><br>1.5 × 10 <sup>-8</sup>   |
| [Dy <sub>2</sub> (L <sup>6</sup> ) <sub>2</sub> ] <sup>[S1h]</sup>                                                                      | /                | N <sub>3</sub> O <sub>4</sub>                    | 3.7692(3)              | 110.19(7)                               | AF                | NO             | /                                                  |
| [Dy <sub>2</sub> (L <sup>6</sup> ) <sub>2</sub> ]·MeCN <sup>[S1h]</sup>                                                                 | MeCN             | N <sub>3</sub> O <sub>4</sub>                    | 3.7692(5)              | 109.53(6)                               | AF                | 8.6            | 2.0 × 10 <sup>-5</sup>                             |
| [Dy <sub>2</sub> ( <i>bfbpen</i> ) <sub>2</sub> (H <sub>2</sub> O) <sub>2</sub> ]·2I <sup>-</sup> <sup>[S1i]</sup>                      | H <sub>2</sub> O | N <sub>4</sub> O <sub>4</sub>                    | 3.845                  | 109.45                                  | AF                | 20.9<br>26.9   | 3.68 × 10 <sup>-6</sup>                            |
| [Dy <sub>2</sub> ( <i>bcbpen</i> ) <sub>2</sub> (H <sub>2</sub> O) <sub>2</sub> ]·2I <sup>-</sup> ·0.5H <sub>2</sub> O <sup>[S1i]</sup> | H <sub>2</sub> O | N <sub>4</sub> O <sub>4</sub>                    | 3.861                  | 110.01                                  | AF                | 72.7           | 6.79 × 10 <sup>-7</sup>                            |
| [Dy <sub>4</sub> (L <sup>7</sup> ) <sub>4</sub> (MeOH) <sub>6</sub> ]·2MeOH <sup>[S1j]</sup>                                            | MeOH             | NO <sub>7</sub><br>NO <sub>8</sub>               | 3.5633(2)<br>3.8418(2) | 98.220<br>100.261<br>107.083<br>107.083 | AF                | 19.7<br>173    | 7.8 × 10 <sup>-6</sup><br>1.2 × 10 <sup>-7</sup>   |
| Dy <sub>2</sub> (L <sup>8</sup> ) <sub>2</sub> (NO <sub>3</sub> ) <sub>2</sub> (MeOH) <sub>2</sub> <sup>[this work]</sup>               | MeOH             | NO <sub>7</sub>                                  | 3.7266(6)              | 106.4(2)                                | F                 | 104            | 1.98 × 10 <sup>-6</sup>                            |
| Dy <sub>2</sub> (L <sup>8</sup> ) <sub>2</sub> (NO <sub>3</sub> ) <sub>2</sub> (EtOH) <sub>2</sub> <sup>[this work]</sup>               | EtOH             | NO <sub>7</sub>                                  | 3.7264(7)              | 106.84(17)                              | F                 | 98.94          | 3.05 × 10 <sup>-6</sup>                            |
| Dy <sub>2</sub> (L <sup>8</sup> ) <sub>2</sub> (NO <sub>3</sub> ) <sub>2</sub> (DMF) <sub>2</sub> <sup>[this work]</sup>                | DMF              | NO <sub>7</sub>                                  | 3.7987(5)              | 108.62(18)<br>109.97(17)                | F                 | 76.28<br>45.54 | 9.54 × 10 <sup>-6</sup><br>3.27 × 10 <sup>-6</sup> |

H<sub>2</sub>L<sup>1</sup> = 2-(2-hydroxy-3-methoxy-benzylideneamino)phenol, H<sub>2</sub>L<sup>2</sup> = 2-hydroxy-N<sup>2</sup>-(2-hydroxy-3-methoxybenzylidene)benzohydrazide, HDBM = dibenzoylmethane, H<sub>2</sub>hmi = (2-hydroxy-3-methoxyphenyl)methylene(isonicotino)hydrazine, H<sub>2</sub>L<sup>3</sup> = 2-(2-hydroxy-3-methoxybenzylidene)hydrazine-1-carboxylic acid, H<sub>2</sub>L<sup>4</sup> = 2-naphthalen-1-ol, H<sub>2</sub>L<sup>5</sup> = 2-ethoxy-6-[[2-(2-hydroxy-3-methoxybenzyl)imino]methyl]phenol, *tmh* = 2,2,6,6-tetramethyl-3,5-heptanedionate, *mbpymNO* = 4-methylbipyrimidine, H<sub>2</sub>L<sup>6</sup> = 2-[[bis(2-hydroxy-3-ethoxybenzyl)(aminoethyl)amino]methyl]phenol), H<sub>2</sub>*bfbpen* = N,N'-bis-(2-hydroxy-5-fluoro-benzyl)-N,N'-bis-(pyridin-2-ylmethyl) ethylenediamine, H<sub>2</sub>*bcbpen* = N,N'-bis-(2-hydroxy-5-chloro-benzyl)-N,N'-bis-(pyridin-2-ylmethyl) ethylenediamine, H<sub>2</sub>L<sup>7</sup> = 2-hydroxy-3-methoxybenzoic acid [(2-hydroxy-3-methoxyphenyl)methylene]hydrazide, H<sub>2</sub>L<sup>8</sup> = 2-(((2-hydroxy-3-methoxybenzyl)imino)methyl)-4-methoxyphenol, F = ferromagnetic, AF = antiferromagnetic.

## 15. Computational details

All of binuclear complexes **1–3** have two types of magnetic center Dy<sup>III</sup> ions indicated as **1(Dy1)**, **1(Dy2)**, **2(Dy1)**, **2(Dy2)**, **3(Dy1)** and **3(Dy2)**, respectively. Complete-active-space self-consistent field (CASSCF) calculations on individual Dy<sup>III</sup> fragments for **1–3** (see Figure S5 for the calculated complete structures of **1–3**) on the basis of single-crystal X-ray determined geometry have been carried out with MOLCAS 8.4<sup>S2</sup> program package. Each individual Dy<sup>III</sup> fragment in **1–3** was calculated keeping the experimentally determined structure of the corresponding compound while replacing the neighboring Dy<sup>III</sup> ion by diamagnetic Lu<sup>III</sup>.

The basis sets for all atoms are atomic natural orbitals from the MOLCAS ANO-RCC library: ANO-RCC-VTZP for Dy<sup>III</sup>; VTZ for close N and O; VDZ for distant atoms. The calculations employed the second order Douglas-Kroll-Hess Hamiltonian, where scalar relativistic contractions were taken into account in the basis set and the spin-orbit couplings were handled separately in the restricted active space state interaction (RASSI-SO) procedure. Active electrons in 7 active spaces include all *f* electrons (CAS(9 in 7) in the CASSCF calculation. To exclude all the doubts, we calculated all the roots in the active space. We have mixed the maximum number of spin-free state which was possible with our hardware (all from 21 sextets, 128 from 224 quadruplets, 130 from 490 doublets for Dy<sup>III</sup>). SINGLE\_ANISO<sup>S3</sup> program was used to obtain the energy levels, *g* tensors, magnetic axes, *et al.*, based on the above CASSCF/RASSI-SO calculations.

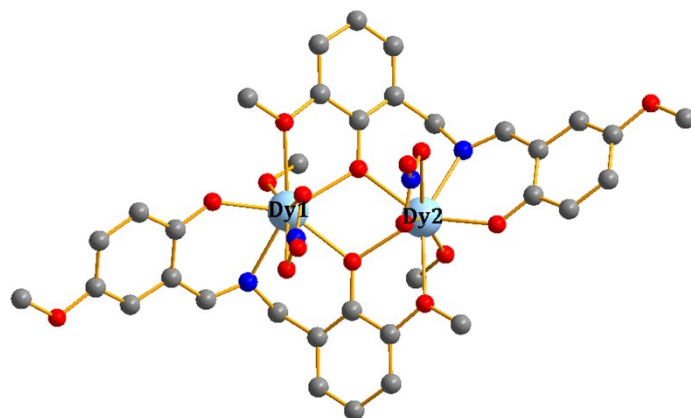

1

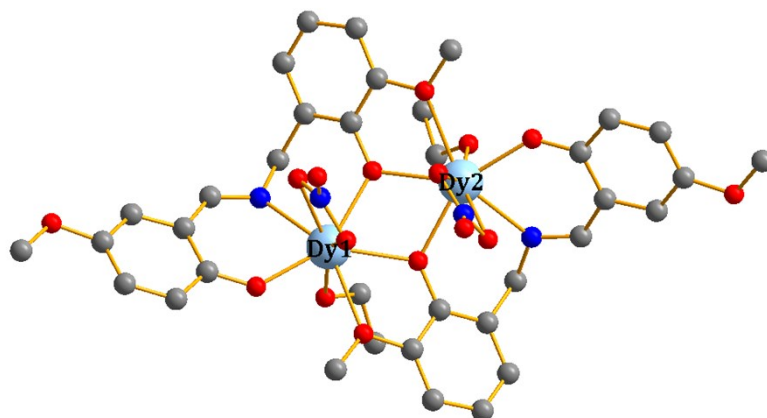

2

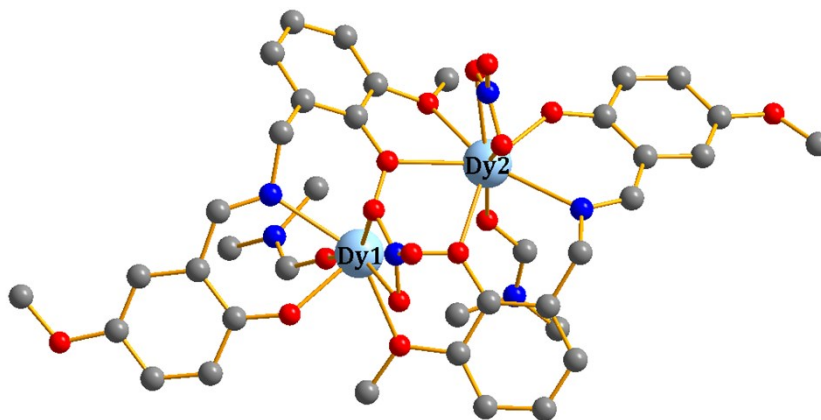

3

**Fig. S11.** Calculated complete structures of complexes 1–3; H atoms are omitted.

**Table S11.** Calculated energy levels ( $\text{cm}^{-1}$ ),  $\mathbf{g}$  ( $g_x, g_y, g_z$ ) tensors and predominant  $m_J$  values of the lowest eight Kramers doublets (KDs) of individual  $\text{Dy}^{\text{III}}$  fragments for complexes 1–3 using CASSCF/RASSI-SO with MOLCAS 8.4.

| KDs | 1(Dy1)             |                          |               | 1(Dy2)             |                          |               | 2(Dy1)             |                          |               | 2(Dy2)             |                          |               |
|-----|--------------------|--------------------------|---------------|--------------------|--------------------------|---------------|--------------------|--------------------------|---------------|--------------------|--------------------------|---------------|
|     | $E/\text{cm}^{-1}$ | $\mathbf{g}$             | $m_J$         |
| 1   | 0.0                | 0.003<br>0.005<br>19.699 | $\pm$<br>15/2 | 0.0                | 0.003<br>0.005<br>19.683 | $\pm$<br>15/2 | 0.0                | 0.002<br>0.004<br>19.724 | $\pm$<br>15/2 | 0.0                | 0.002<br>0.004<br>19.734 | $\pm$<br>15/2 |
| 2   | 228.5              | 0.067<br>0.078<br>16.862 | $\pm$<br>13/2 | 228.7              | 0.067<br>0.078<br>16.865 | $\pm$<br>13/2 | 239.9              | 0.063<br>0.068<br>16.902 | $\pm$<br>13/2 | 240.1              | 0.062<br>0.069<br>16.899 | $\pm$<br>13/2 |
| 3   | 379.4              | 0.833<br>0.998<br>13.626 | $\pm$<br>11/2 | 379.8              | 0.831<br>0.996<br>13.631 | $\pm$<br>11/2 | 391.9              | 0.669<br>0.766<br>13.703 | $\pm$<br>11/2 | 392.7              | 0.669<br>0.767<br>13.700 | $\pm$<br>11/2 |

|     |                    |                          |           |                    |                          |           |       |                          |          |       |                          |          |
|-----|--------------------|--------------------------|-----------|--------------------|--------------------------|-----------|-------|--------------------------|----------|-------|--------------------------|----------|
| 4   | 473.4              | 4.852<br>6.311<br>8.375  | ±<br>9/2  | 473.6              | 4.864<br>6.368<br>8.362  | ±<br>9/2  | 488.7 | 4.793<br>5.766<br>8.837  | ±<br>9/2 | 489.9 | 4.805<br>5.762<br>8.825  | ±<br>9/2 |
| 5   | 526.7              | 1.429<br>3.177<br>13.007 | ±<br>1/2  | 526.9              | 1.391<br>3.129<br>13.034 | ±<br>1/2  | 543.1 | 1.728<br>3.684<br>12.702 | ±<br>3/2 | 544.0 | 1.736<br>3.718<br>12.751 | ±<br>3/2 |
| 6   | 590.4              | 0.454<br>1.273<br>14.575 | ±<br>3/2  | 590.5              | 0.471<br>1.292<br>14.556 | ±<br>3/2  | 596.6 | 0.110<br>1.319<br>14.499 | ±<br>7/2 | 597.6 | 0.109<br>1.288<br>14.599 | ±<br>7/2 |
| 7   | 625.0              | 0.661<br>0.996<br>14.691 | ±<br>5/2  | 624.9              | 0.675<br>1.037<br>14.675 | ±<br>5/2  | 639.9 | 0.008<br>0.735<br>14.352 | ±<br>5/2 | 641.0 | 0.021<br>0.725<br>14.431 | ±<br>5/2 |
| 8   | 663.4              | 0.242<br>0.581<br>17.084 | ±<br>7/2  | 663.3              | 0.245<br>0.588<br>17.109 | ±<br>7/2  | 669.1 | 0.355<br>1.043<br>16.177 | ±<br>1/2 | 670.3 | 0.344<br>1.008<br>16.259 | ±<br>1/2 |
| KDs | <b>3(Dy1)</b>      |                          |           | <b>3(Dy2)</b>      |                          |           |       |                          |          |       |                          |          |
|     | $E/\text{cm}^{-1}$ | <b>g</b>                 | $m_J$     | $E/\text{cm}^{-1}$ | <b>g</b>                 | $m_J$     |       |                          |          |       |                          |          |
| 1   | 0.0                | 0.001<br>0.002<br>19.741 | ±<br>15/2 | 0.0                | 0.004<br>0.006<br>19.658 | ±<br>15/2 |       |                          |          |       |                          |          |
| 2   | 211.8              | 0.057<br>0.061<br>16.850 | ±<br>13/2 | 202.3              | 0.049<br>0.073<br>16.619 | ±<br>13/2 |       |                          |          |       |                          |          |
| 3   | 354.0              | 1.258<br>1.944<br>13.621 | ±<br>11/2 | 341.2              | 0.371<br>0.514<br>13.436 | ±<br>11/2 |       |                          |          |       |                          |          |
| 4   | 419.3              | 2.949<br>5.353<br>12.286 | ±<br>5/2  | 417.5              | 4.436<br>5.291<br>11.768 | ±<br>7/2  |       |                          |          |       |                          |          |
| 5   | 486.5              | 0.599<br>4.980<br>9.938  | ±<br>7/2  | 463.3              | 1.231<br>3.286<br>11.449 | ±<br>5/2  |       |                          |          |       |                          |          |
| 6   | 563.4              | 0.378<br>3.284<br>13.505 | ±<br>3/2  | 522.0              | 1.992<br>3.407<br>13.764 | ±<br>3/2  |       |                          |          |       |                          |          |
| 7   | 608.6              | 1.048<br>2.497<br>15.847 | ±<br>1/2  | 585.1              | 0.648<br>1.241<br>15.768 | ±<br>1/2  |       |                          |          |       |                          |          |
| 8   | 670.5              | 0.065<br>0.207<br>18.840 | ±<br>9/2  | 652.4              | 0.052<br>0.150<br>18.683 | ±<br>9/2  |       |                          |          |       |                          |          |



**Table S12.** Wave functions with definite projection of the total moment  $|m_J\rangle$  for the lowest two KDs of individual Dy<sup>III</sup> fragments for complexes **1–3**.

|               | $E/\text{cm}^{-1}$ | wave functions                                                             |
|---------------|--------------------|----------------------------------------------------------------------------|
| <b>1(Dy1)</b> | 0.0                | 97.1% $ \pm 15/2\rangle$                                                   |
|               | 228.5              | 80.6% $ \pm 13/2\rangle$ +10.7% $ \pm 9/2\rangle$ +5.7% $ \pm 11/2\rangle$ |
| <b>1(Dy2)</b> | 0.0                | 97.1% $ \pm 15/2\rangle$                                                   |
|               | 228.7              | 80.7% $ \pm 13/2\rangle$ +10.7% $ \pm 9/2\rangle$ +5.7% $ \pm 11/2\rangle$ |
| <b>2(Dy1)</b> | 0.0                | 97.7% $ \pm 15/2\rangle$                                                   |
|               | 239.9              | 82% $ \pm 13/2\rangle$ +9.7% $ \pm 9/2\rangle$ +5.6% $ \pm 11/2\rangle$    |
| <b>2(Dy2)</b> | 0.0                | 97.6% $ \pm 15/2\rangle$                                                   |
|               |                    | 81.7% $ \pm 13/2\rangle$ +9.7% $ \pm 9/2\rangle$ +5.8% $ \pm 11/2\rangle$  |
| <b>3(Dy1)</b> | 0.0                | 97.6% $ \pm 15/2\rangle$                                                   |
|               | 211.8              | 92.3% $ \pm 13/2\rangle$ +3.9% $ \pm 9/2\rangle$                           |
| <b>3(Dy2)</b> | 0.0                | 96.3% $ \pm 15/2\rangle$                                                   |
|               | 202.3              | 88.9% $ \pm 13/2\rangle$ +8.8% $ \pm 9/2\rangle$                           |

To fit the exchange interactions in complexes **1–3**, we took two steps to obtain them. Firstly, we calculated individual Dy<sup>III</sup> fragments using CASSCF/RASSI-SO to obtain the corresponding magnetic properties. Then, the exchange interactions between the magnetic centers were considered within the Lines model,<sup>S4</sup> while the account of the dipole-dipole magnetic couplings were treated exactly. The Lines model is effective and has been successfully used widely in the research field of *d* and *f*-elements single-molecule magnets.<sup>S5</sup>

For complexes **1–3**, there is only one type of *J*.

The Ising exchange Hamiltonian is:

$$H_{exch} = -JS_{Dy1}S_{Dy2} \quad (1)$$

The  $J_{total}$  is the parameter of the total magnetic interaction ( $J_{total} = J_{dip} + J_{exch}$ ) between magnetic center ions. The  $S_{Dy} = 1/2$  is the ground pseudospin on the Dy<sup>III</sup> site. The dipolar magnetic coupling can be calculated exactly, while the exchange coupling constant was fitted through comparison of the computed and measured magnetic susceptibilities using the POLY\_ANISO program.<sup>S3</sup>

**Table S13.** Exchange energies  $E$  ( $\text{cm}^{-1}$ ), the energy difference between each exchange doublets  $\Delta_t$  ( $\text{cm}^{-1}$ ) and the main values of the  $g_z$  for the lowest two exchange doublets of **1–3**.

|   | 1    |                       |        | 2    |                       |        | 3    |                       |        |
|---|------|-----------------------|--------|------|-----------------------|--------|------|-----------------------|--------|
|   | $E$  | $\Delta_t$            | $g_z$  | $E$  | $\Delta_t$            | $g_z$  | $E$  | $\Delta_t$            | $g_z$  |
| 1 | 0.00 | $0.27 \times 10^{-6}$ | 38.252 | 0.00 | $0.97 \times 10^{-7}$ | 38.408 | 0.00 | $0.83 \times 10^{-7}$ | 39.297 |
| 2 | 0.61 | $0.42 \times 10^{-6}$ | 9.367  | 1.03 | $0.24 \times 10^{-6}$ | 9.043  | 0.34 | $0.20 \times 10^{-6}$ | 2.842  |

### References:

- S1 (a) K. Zhang, D. Liu, V. Vieru, L. Hou, B. Cui, F. S. Guo, L. F. Chibotaru and Y. Y. Wang, *Dalton Trans.*, 2017, **46**, 638-642; (b) K. Zhang, C. Yuan, F. S. Guo, Y. Q. Zhang and Y. Y. Wang, *Dalton Trans.*, 2016, **46**, 186-192; (c) P. H. Lin, T. J. Burchell, R. Clerac and M. Murugesu, *Angew. Chem., Int. Ed.*, 2008, **47**, 8848-8851; (d) J. Zhang, F. H. Zhang, Y. M. Chen, X. F. Zhang, Y. H. Li, W. Liu and Y. P. Dong, *Dalton Trans.*, 2016, **45**, 16463-16470; (e) K. Zhang, F. S. Guo and Y. Y. Wang, *Dalton Trans.*, 2017, **46**, 1753-1756; (f) R.-Y. Qin, H.-F. Zhang, H. Sun, Y.-D. Pan, Y. Ge, Y.-H. Li and Y.-Q. Zhang, *Chem. -Asian J.*, 2017, **12**, 2834-2844; (g) I. F. Díaz-Ortega, J. M. Herrera, D. Aravena, E. Ruiz, T. Gupta, G. Rajaraman, H. Nojiri and E. Colacio, *Inorg. Chem.*, 2018, **57**, 6362-6375; (h) Y. Ge, Y.-R. Qin, Y.-F. Cui, Y.-D. Pan, Y. Huang, Y.-H. Li, W. Liu and Y.-Q. Zhang, *Chem.-Asian J.*, 2018, **13**, 3753-3761; (i) X. F. Ma, B. B. Chen, Y. Q. Zhang, J. H. Yang, Q. Shi, Y. L. Ma and X. Y. Liu, *Dalton Trans.*, 2019, **48**, 12622-12631. (j) Y.-N. Guo, G.-F. Xu, P. Gamez, L. Zhao, S.-Y. Lin, R. P. Deng, J. K. Tang and H.-J. Zhang, *J. Am. Chem. Soc.*, 2010, **132**, 8538-8539.
- S2 F. Aquilante, J. Autschbach, R. K. Carlson, L. F. Chibotaru, M. G. Delcey, L. De Vico, I. Fdez. Galván, N. Ferré, L. M. Frutos, L. Gagliardi, M. Garavelli, A. Giussani, C. E. Hoyer, G. Li Manni, H. Lischka, D. Ma, P. Å. Malmqvist, T. Müller, A. Nenov, M. Olivucci, T. B. Pedersen, D. Peng, F. Plasser, B. Pritchard, M. Reiher, I. Rivalta, I. Schapiro, J. Segarra-Martí, M. Stenrup, D. G. Truhlar, L. Ungur, A. Valentini, S. Vancoillie, V. Veryazov, V. P. Vysotskiy, O. Weingart, F. Zapata, R. Lindh, MOLCAS 8: New Capabilities for Multiconfigurational Quantum Chemical Calculations across the Periodic Table, *J. Comput. Chem.*, 2016, **37**, 506.
- S3 (a) L. F. Chibotaru, L. Ungur and A. Soncini, *Angew. Chem. Int. Ed.*, 2008, **47**, 4126. (b) L. Ungur, W. Van den Heuvel and L. F. Chibotaru, *New J. Chem.*, 2009, **33**, 1224. (c) L. F. Chibotaru, L. Ungur, C. Aronica, H. Elmoll, G. Pilet and D. Luneau, *J. Am. Chem. Soc.*, 2008, **130**, 12445.
- S4 Lines, M. E. *J. Chem. Phys.*, **1971**, **55**, 2977.
- S5 (a) K. C. Mondal, A. Sundt, Y. H. Lan, G. E. Kostakis, O. Waldmann, L. Ungur, L. F. Chibotaru, C. E. Anson and A. K. Powell, *Angew. Chem., Int. Ed.*, 2012, **51**, 7550. (b) S. K. Langley, D. P. Wielechowski, V. Vieru, N. F. Chilton, B. Moubaraki, B. F. Abrahams, L. F. Chibotaru and K. S. Murray, *Angew. Chem., Int. Ed.*, 2013, **52**, 12014.
